# Supplementary material for: Novel polythiophene derivatives functionalized with conjugated side-chain pendants comprising triphenylamine/carbazole moieties for photovoltaic cell applications
Source: Royal Society of Chemistry journal article supplement (doi:10.1039/c2py20477k), 2012-09-08
Supplement: c2py20477k.pdf [file c2py20477k.pdf]

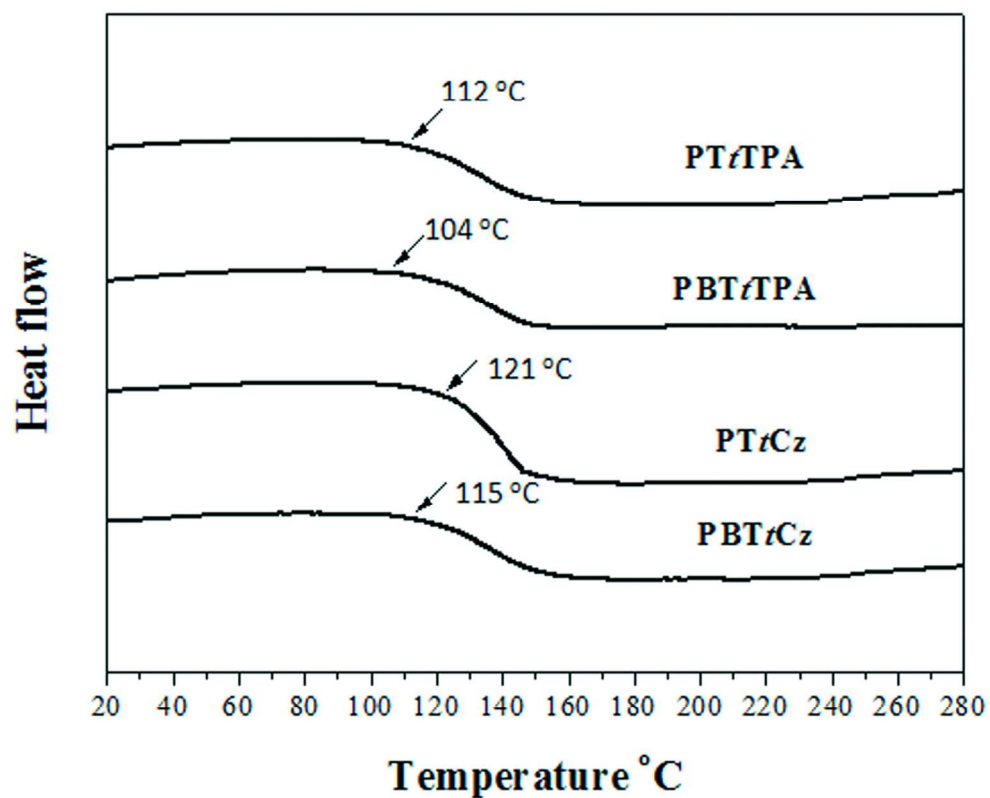

: ]["G%" DSC curves of studied PTs at the heating rate of 10oC/min under a nitrogen atmosphere.

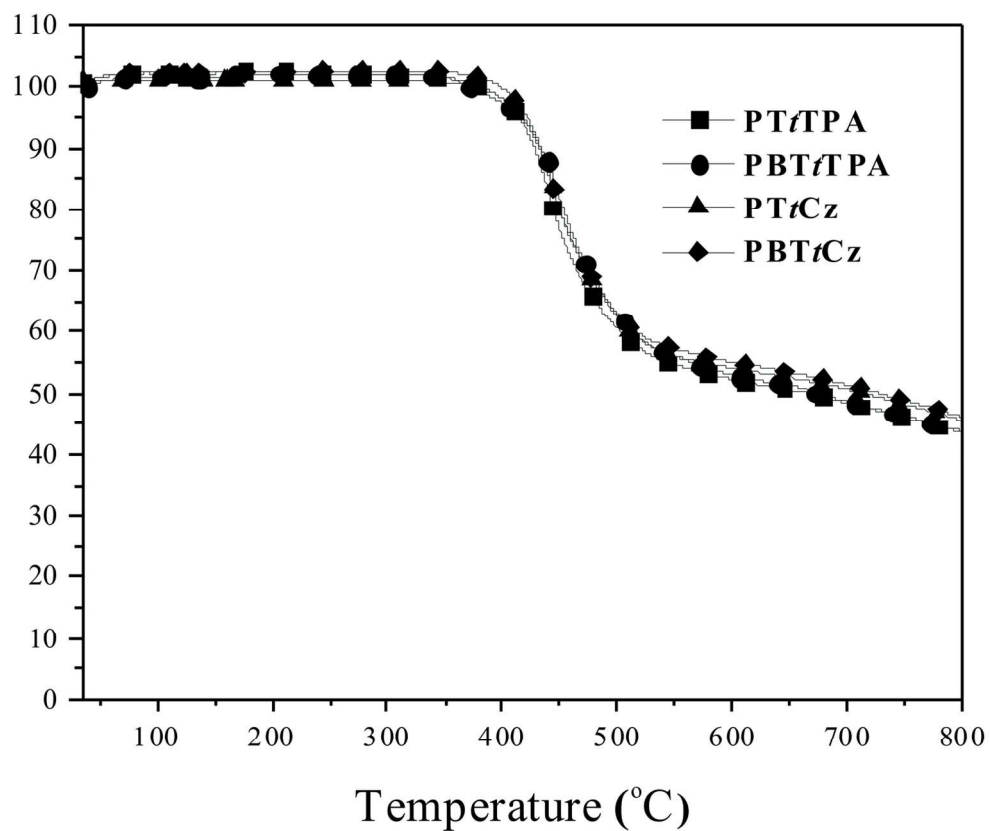

: ]["G&" TGA curves of studied PTs at the heating rate of 10oC/min under a nitrogen atmosphere.
